# Supplementary material
Source: PubMed Central journal article supplement (PMC7213957)

# THE LANCET

## Supplementary appendix

This appendix formed part of the original submission. We post it as supplied by the authors.

Supplement to: Loupy A, Aubert O, Reese PP, Bastien O, Bayer F, Jacquelinet C. Organ procurement and transplantation during the COVID-19 pandemic. *Lancet* 2020; published online May 11. [http://dx.doi.org/10.1016/S0140-6736\(20\)31040-0](http://dx.doi.org/10.1016/S0140-6736(20)31040-0).

**SUPPLEMENTARY FIGURE:** Geographical association between areas with high levels of hospitalisation due to COVID-19 on April 6th 2020 (**Panel A**) and the overall organ procurement observed between March 2019 - April 6th 2019 (Reference period, Panel B) and March 2020 - April 6th 2020 (**COVID outbreak period, Panel C**).

**Panel A**

COVID related hospitalizations  
March 2019 - April 6<sup>th</sup> 2019

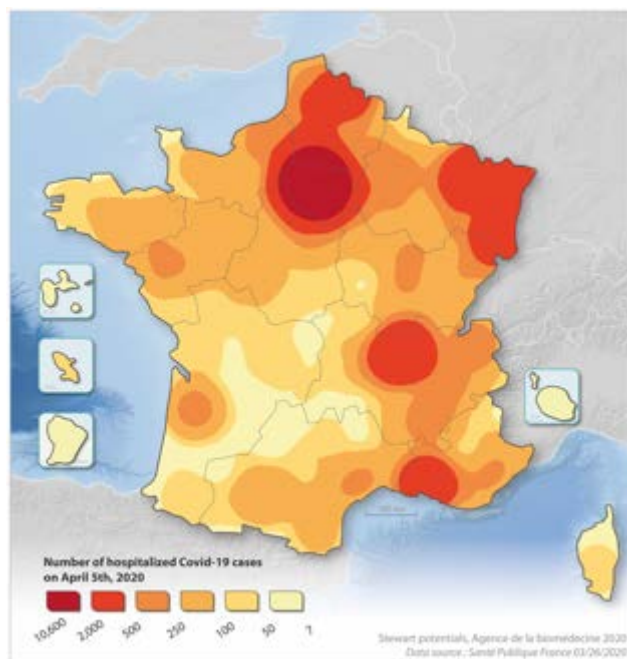

**Panel B**

Organ procurement (Reference interval)  
March 2019 - April 6<sup>th</sup> 2019

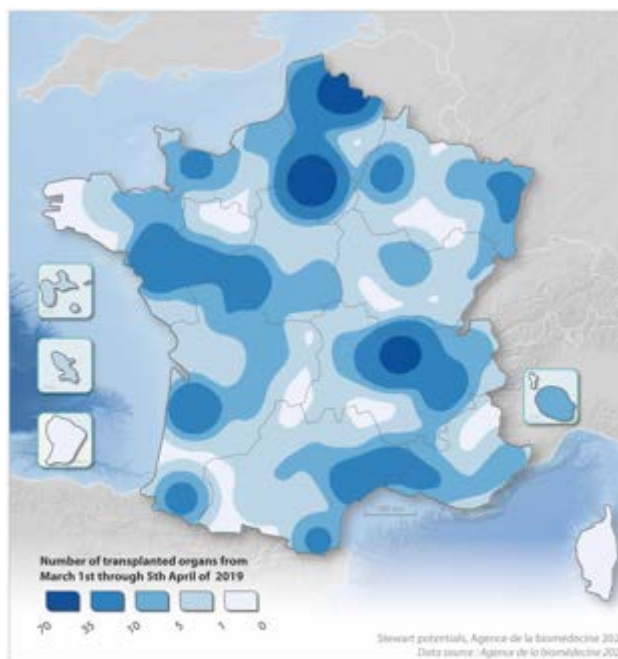

**Panel C**

Organ procurement (COVID outbreak)  
March 2020 - April 6<sup>th</sup> 2020

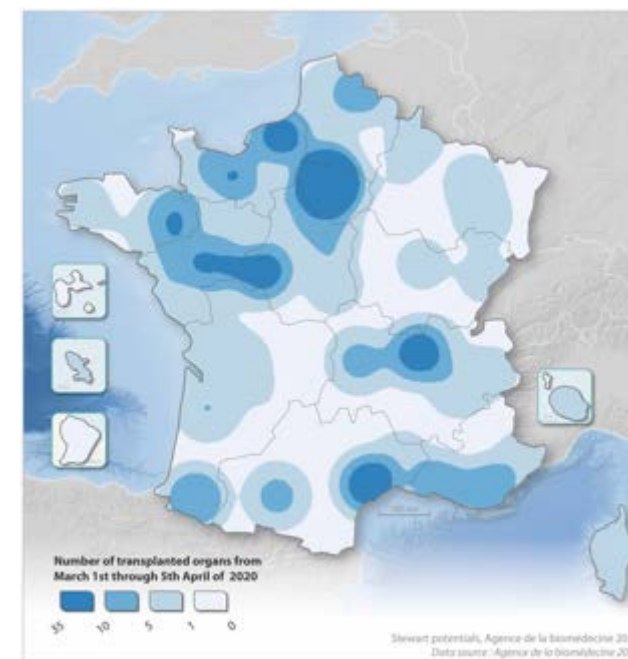

Supplement: mmc1.pdf [file mmc1.pdf]
